# Supplementary material for: Phosphocalcic Markers and Calcification Propensity for Assessment of Interstitial Fibrosis and Vascular Lesions in Kidney Allograft Recipients
Source: PubMed Central journal article supplement (PMC5201285; doi:10.1371/journal.pone.0167929), 2016-12-30
Supplement: pone.0167929.s009.pdf [file pone.0167929.s009.pdf]

### Supplementary Table

**Table S1.** Level values of phosphocalcic biomarkers and T<sub>50</sub> across Von Kossa results (n=88).

| <b>Biomarkers</b>                 | <b>Positive Von Kossa<br/>(n=8)</b> | <b>Negative Von Kossa<br/>(n=80)</b> | <b>p Value</b> |
|-----------------------------------|-------------------------------------|--------------------------------------|----------------|
| Phosphate (mmol/l)                | 0.96 (0.67-1.1)                     | 1.11 (1.01-1.26)                     | 0.14           |
| Calcium (mmol/l)                  | 2.39 (2.28-2.46)                    | 2.43 (2.32-2.52)                     | 0.17           |
| Vitamine D (nmol/l)               | 62.5 (46.5-80)                      | 70.5 (57-83)                         | 0.31           |
| PTH (pmol/l)                      | 9.55 (6.35-16.6)                    | 8.9 (6.2-10.8)                       | 0.41           |
| FGF23 (RU/ml)                     | 29.5 (24.7-44.8)                    | 39.3 (26.4-55.7)                     | 0.26           |
| Klotho (pg/ml)                    | 731.7 (597.8-921.9)                 | 695.0 (575.9-837.8)                  | 0.73           |
| T <sub>50</sub> (min)             | 270 (232.5-318)                     | 282 (247.5-330)                      | 0.61           |
| eGFR (ml/min/1.73m <sup>2</sup> ) | 50 (38-57.5)                        | 53.5 (40.5-67)                       | 0.38           |

*Values reported as median and IQR. eGFR: estimated Glomerular Filtration Rate; FGF23: Fibroblast growth factor 23; PTH: parathyroid hormone; T<sub>50</sub>: Calcification propensity.*
